# Supplementary material for: Proximity labeling identifies LOTUS domain proteins that promote the formation of perinuclear germ granules in C. elegans
Source: eLife. 2021 Nov 3;10:e72276. doi: 10.7554/eLife.72276 (PMC8616582; doi:10.7554/eLife.72276)
Supplement: Supplementary file 1. [file elife-72276-supp1.xlsx]

## Sheet: Sheet1
Supplementary File 1. Proteins enriched by DEPS-1::TurboID and TurboID::GLH-1
Protein ID	Stable gene ID	Disorder (%)	Bait
AAGR-4	WBGene00018682	22.4352	GLH-1
AARS-2	WBGene00000197	27.5891	GLH-1
ABCE-1	WBGene00012714	22.9222	DEPS-1
ABCF-3	WBGene00018339	30.5936	DEPS-1
ACDH-13	WBGene00001566	17.7847	DEPS-1
ACLY-2	WBGene00007150	23.1342	DEPS-1
ALDO-2	WBGene00017166	25.6038	GLH-1/DEPS-1
ALFA-1	WBGene00017547	24.4052	GLH-1
ANI-1	WBGene00013038	54.0685	GLH-1
ARX-3	WBGene00000201	15.8782	GLH-1
ATX-2	WBGene00000231	71.7871	GLH-1
BMK-1	WBGene00000257	42.0783	GLH-1/DEPS-1
BUB-1	WBGene00000275	34.8948	GLH-1
C27B7.5	WBGene00007762	55.8488	GLH-1
C38D4.4/EGGD-1	WBGene00008005	48.5134	GLH-1/DEPS-1
CASH-1	WBGene00010631	44.7085	GLH-1/DEPS-1
CCT-8	WBGene00021934	26.3534	DEPS-1
CDC-48.2	WBGene00008053	32.159	GLH-1
CDE-1	WBGene00019629	30.288	GLH-1
CEY-2	WBGene00000473	59.3542	GLH-1/DEPS-1
CEY-3	WBGene00000474	47.6471	GLH-1/DEPS-1
CLS-2	WBGene00000549	33.2055	GLH-1
CPB-3	WBGene00000772	45.6695	GLH-1/DEPS-1
CPF-2	WBGene00000774	62.5576	GLH-1
CSN-1	WBGene00000813	32.7175	DEPS-1
CSR-1	WBGene00017641	33.5311	GLH-1/DEPS-1
CZW-1	WBGene00017643	14.8848	GLH-1/DEPS-1
D2005.4	WBGene00008399	31.5527	GLH-1/DEPS-1
DAF-18	WBGene00000913	40.1144	DEPS-1
DCAP-1	WBGene00021929	36.7737	GLH-1/DEPS-1
DCAP-2	WBGene00003582	49.9396	GLH-1
DCR-1	WBGene00000939	28.0612	DEPS-1
DDX-19	WBGene00011580	44.5408	GLH-1
DEPS-1	WBGene00022034	26.4782	DEPS-1
DNJ-11	WBGene00001029	43.9877	GLH-1/DEPS-1
DRH-1	WBGene00001090	22.063	DEPS-1
DRH-3	WBGene00008400	25.4663	GLH-1/DEPS-1
ECH-5	WBGene00001154	19.1628	DEPS-1
EDC-3	WBGene00011036	39.1628	GLH-1
EDC-4	WBGene00021551	31.8351	GLH-1/DEPS-1
EGO-1	WBGene00001214	22.2382	GLH-1/DEPS-1
EIF-2A	WBGene00008480	33.2259	GLH-1/DEPS-1
EIF-3.H	WBGene00001231	29.2271	DEPS-1
EKL-1	WBGene00009052	25.1027	GLH-1/DEPS-1
EKL-6	WBGene00011806	14.8421	GLH-1
EMB-5	WBGene00001259	36.0016	DEPS-1
ERFA-3	WBGene00010405	33.8827	GLH-1/DEPS-1
F01G4.4	WBGene00008503	62.3402	GLH-1
F07B7.2	WBGene00017186	41.4646	DEPS-1
F10G7.10	WBGene00017373	22.4242	DEPS-1
F13D12.5	WBGene00008740	22.7456	GLH-1/DEPS-1
F42A10.5	WBGene00018341	71.1739	GLH-1
F42G9.1	WBGene00018362	50.3888	GLH-1/DEPS-1
F46F11.1	WBGene00018508	37.9579	GLH-1/DEPS-1
F52B5.3	WBGene00009922	37.892	GLH-1/DEPS-1
F52C6.2	WBGene00018659	46.1065	GLH-1
F55A12.5	WBGene00018864	35.5705	GLH-1/DEPS-1
F55F8.2	WBGene00018890	39.0369	DEPS-1
F56B3.4	WBGene00004824	31.0705	DEPS-1
F56C9.6	WBGene00018950	60.8256	GLH-1
F58G11.3/EGGD-2	WBGene00010281	46.534	GLH-1/DEPS-1
FARD-1	WBGene00022200	12.9978	GLH-1
FKB-6	WBGene00001431	37.3932	DEPS-1
FRM-4	WBGene00001491	36.0983	GLH-1
FUBL-2	WBGene00022738	54.5438	GLH-1
GCN-1	WBGene00021697	19.2489	DEPS-1
GLD-1	WBGene00001595	45.0386	GLH-1/DEPS-1
GLD-2	WBGene00001596	60.6069	GLH-1/DEPS-1
GLD-3	WBGene00001597	48.0697	GLH-1
GLH-1	WBGene00001598	39.167	GLH-1/DEPS-1
GLH-2	WBGene00001599	45.0861	GLH-1/DEPS-1
GLH-3	WBGene00001600	32.8083	GLH-1/DEPS-1
GLH-4	WBGene00001601	48.8839	GLH-1/DEPS-1
GLS-1	WBGene00007975	57.0543	GLH-1
GPX-2	WBGene00011045	17.7436	DEPS-1
GYF-1	WBGene00016002	62.0053	GLH-1/DEPS-1
H05L14.2	WBGene00010367	36.4977	GLH-1
H34C03.2	WBGene00019259	31.5719	GLH-1/DEPS-1
HAF-9	WBGene00001819	17.3161	GLH-1/DEPS-1
HCP-1	WBGene00001829	52.8622	GLH-1/DEPS-1
HIP-1	WBGene00011735	58.625	GLH-1/DEPS-1
HPO-32	WBGene00015313	61.0601	GLH-1
HPO-40	WBGene00014113	45.1431	GLH-1/DEPS-1
HSP-110	WBGene00016250	34.4419	DEPS-1
HSP-16.2	WBGene00002016	34.3135	DEPS-1
IFE-1	WBGene00002059	24.1723	GLH-1/DEPS-1
IFG-1	WBGene00002066	56.2926	GLH-1
IMA-2	WBGene00002073	32.5872	GLH-1/DEPS-1
INTS-5	WBGene00013075	10.2626	DEPS-1
INTS-8	WBGene00013021	18.0174	DEPS-1
ITSN-1	WBGene00006405	45.8869	GLH-1/DEPS-1
K07H8.10	WBGene00019510	73.1608	DEPS-1
K12D12.5	WBGene00010787	24.8965	GLH-1
KLP-7	WBGene00002219	48.7193	GLH-1
LEA-1	WBGene00002263	63.9487	GLH-1/DEPS-1
LET-418	WBGene00002637	43.8826	DEPS-1
LET-502	WBGene00002694	37.0656	GLH-1
LET-711	WBGene00002845	27.1442	GLH-1/DEPS-1
LOTR-1	WBGene00008385	33.4535	GLH-1/DEPS-1
LPD-7	WBGene00003063	27.9499	GLH-1
M01H9.3	WBGene00019719	59.7141	GLH-1
MAP-2	WBGene00003130	34.4819	GLH-1
MAPH-1.2	WBGene00009113	54.2883	GLH-1/DEPS-1
MASK-1	WBGene00011240	47.0963	GLH-1
MCT-3	WBGene00010834	15.5941	DEPS-1
MDT-4	WBGene00007012	60.5183	GLH-1/DEPS-1
MDT-6	WBGene00003164	42.3328	DEPS-1
MEG-3	WBGene00001569	54.3001	GLH-1
MEG-4	WBGene00016485	56.1379	GLH-1
MEL-46	WBGene00020284	40.6591	GLH-1
METR-1	WBGene00010988	21.9668	GLH-1/DEPS-1
MEX-3	WBGene00003229	45.9031	GLH-1/DEPS-1
MIX-1	WBGene00003367	36.9951	GLH-1
MOG-4	WBGene00003392	33.9471	GLH-1
MOG-5	WBGene00003393	39.4781	GLH-1
NAP-1	WBGene00017075	32.7565	DEPS-1
NASP-2	WBGene00008218	61.9747	GLH-1/DEPS-1
NATC-1	WBGene00020719	22.4412	GLH-1/DEPS-1
NHL-2	WBGene00003598	41.2218	GLH-1
NPP-10	WBGene00003796	42.9088	GLH-1
NPP-13	WBGene00003799	26.9282	GLH-1
NPP-14	WBGene00003800	48.52	GLH-1/DEPS-1
NPP-21	WBGene00019940	60.1111	GLH-1
NPP-24	WBGene00022672	22.4652	DEPS-1
NPP-4	WBGene00003790	43.775	GLH-1
NPP-6	WBGene00003792	22.285	GLH-1/DEPS-1
NPP-7	WBGene00003793	57.4342	GLH-1
NPP-9	WBGene00003795	48.1184	GLH-1/DEPS-1
NUD-1	WBGene00003829	45.5965	DEPS-1
OMA-1	WBGene00003864	45.4032	GLH-1
PAT-4	WBGene00003931	21.3401	GLH-1
PERM-4	WBGene00016638	45.917	DEPS-1
PFD-2	WBGene00019220	40.9124	DEPS-1
PGL-1	WBGene00003992	34.1883	GLH-1/DEPS-1
PGL-2	WBGene00003993	18.8077	GLH-1
PGL-3	WBGene00003994	34.5771	GLH-1/DEPS-1
PID-3	WBGene00021270	21.1503	GLH-1
PID-5	WBGene00021555	22.4262	GLH-1/DEPS-1
PLK-1	WBGene00004042	32.5784	GLH-1
PPFR-4	WBGene00022193	40.5866	GLH-1/DEPS-1
PPW-1	WBGene00004093	25.1005	GLH-1/DEPS-1
PPW-2	WBGene00004094	29.4754	GLH-1/DEPS-1
PQN-59	WBGene00004143	72.5003	GLH-1/DEPS-1
PQN-87	WBGene00004167	58.9763	GLH-1
PRG-1	WBGene00004178	27.0517	GLH-1/DEPS-1
PUF-3	WBGene00004239	21.9362	GLH-1
PUF-5	WBGene00004241	16.9627	GLH-1/DEPS-1
R05F9.6	WBGene00019890	20.7289	DEPS-1
R09E10.6	WBGene00011176	32.8446	DEPS-1
R74.8	WBGene00011282	30.2814	GLH-1
RAN-2	WBGene00004303	24.6639	GLH-1
RBM-39	WBGene00021921	52.4072	GLH-1
RDE-12	WBGene00010280	59.0676	GLH-1/DEPS-1
RHA-1	WBGene00004355	33.1497	GLH-1
RPAC-40	WBGene00019275	27.1427	DEPS-1
RPB-2	WBGene00016140	27.9904	GLH-1
RPL-32	WBGene00004446	43.5964	GLH-1
RPN-11	WBGene00004467	28.4248	GLH-1/DEPS-1
RPN-2	WBGene00004459	25.8543	GLH-1/DEPS-1
RPN-9	WBGene00004465	15.2217	GLH-1/DEPS-1
SAO-1	WBGene00011195	55.7113	DEPS-1
SART-3	WBGene00007111	32.9652	GLH-1
SEC-6	WBGene00017284	24.9313	GLH-1/DEPS-1
SKR-7	WBGene00004813	36.492	GLH-1/DEPS-1
SMC-4	WBGene00004874	46.5775	GLH-1/DEPS-1
SMG-2	WBGene00004880	34.2536	GLH-1
SNA-2	WBGene00011747	43.8933	GLH-1
SNAP-29	WBGene00019305	67.567	GLH-1
SPE-15	WBGene00004969	27.0166	DEPS-1
SPTL-3	WBGene00011932	19.4411	GLH-1
SQV-4	WBGene00005022	17.0468	GLH-1/DEPS-1
SYF-1	WBGene00016837	24.3051	GLH-1
T02G5.7	WBGene00020166	20.4607	DEPS-1
T04C9.1	WBGene00020209	32.3135	GLH-1
T05F1.2	WBGene00011489	31.7884	DEPS-1
T05H10.1	WBGene00011507	33.1169	DEPS-1
T20B12.7	WBGene00020604	28.9776	DEPS-1
T22B7.7	WBGene00020674	27.8788	DEPS-1
T23H2.3	WBGene00020742	45.6696	DEPS-1
T26A5.2	WBGene00020819	30.5785	GLH-1
TANK-1	WBGene00004053	29.6189	DEPS-1
TCC-1	WBGene00013340	53.8953	GLH-1
TIAR-1	WBGene00015943	46.1275	GLH-1/DEPS-1
TTC-1	WBGene00016390	43.3657	DEPS-1
TXL-1	WBGene00021826	22.7064	DEPS-1
UBH-4	WBGene00006724	28.1723	GLH-1
UBXN-6	WBGene00019163	36.3181	GLH-1
ULE-5	WBGene00013394	39.5217	DEPS-1
ULP-1	WBGene00006736	40.5481	GLH-1
USO-1	WBGene00010713	25.8815	GLH-1/DEPS-1
W07E11.1	WBGene00012326	25.8822	GLH-1/DEPS-1
W09D10.1	WBGene00012359	48.4923	GLH-1
WAGO-1	WBGene00011061	31.4473	GLH-1/DEPS-1
WAGO-4	WBGene00010263	26.3354	GLH-1/DEPS-1
XRN-1	WBGene00012730	41.0681	GLH-1/DEPS-1
Y110A7A.15	WBGene00022462	23.2181	GLH-1/DEPS-1
Y111B2A.3	WBGene00013729	25.8248	GLH-1/DEPS-1
Y38E10A.17	WBGene00012595	45.3811	GLH-1
Y39A3CL.4	WBGene00021442	31.3109	GLH-1/DEPS-1
Y66D12A.19	WBGene00013445	56.2693	GLH-1
Y71F9AL.12	WBGene00022117	38.9966	DEPS-1
Y75B8A.25	WBGene00013558	45.241	GLH-1
ZNFX-1	WBGene00014208	24.8288	GLH-1/DEPS-1
ZWL-1	WBGene00021460	23.6249	GLH-1
