# Supplementary material for: Proximity labeling identifies LOTUS domain proteins that promote the formation of perinuclear germ granules in C. elegans
Source: eLife. 2021 Nov 3;10:e72276. doi: 10.7554/eLife.72276 (PMC8616582; doi:10.7554/eLife.72276)
Supplement: Supplementary file 2. [file elife-72276-supp2.xlsx]

## Sheet: Sheet1
Supplementary File 2. Known components of P granules, Z granules and Mutator foci in hermaphrodite germ line.
Compartment	Protein	Enriched from
P granule	CDE-1	TurboID::GLH-1
P granule	CSR-1	TurboID::GLH-1;DEPS-1::TurboID
P granule	DDX-19	TurboID::GLH-1
P granule	DEPS-1	DEPS-1::TurboID
P granule	DRH-3	TurboID::GLH-1;DEPS-1::TurboID
P granule	EGO-1	TurboID::GLH-1;DEPS-1::TurboID
P granule	EKL-1	TurboID::GLH-1;DEPS-1::TurboID
P granule	GLH-1	TurboID::GLH-1;DEPS-1::TurboID
P granule	GLH-2	TurboID::GLH-1;DEPS-1::TurboID
P granule	GLH-3	TurboID::GLH-1;DEPS-1::TurboID
P granule	GLH-4	TurboID::GLH-1;DEPS-1::TurboID
P granule	PARN-1	not enriched
P granule	PGL-1	TurboID::GLH-1;DEPS-1::TurboID
P granule	PGL-2	TurboID::GLH-1
P granule	PGL-3	TurboID::GLH-1;DEPS-1::TurboID
P granule	PRG-1	TurboID::GLH-1;DEPS-1::TurboID
P granule	RDE-12	TurboID::GLH-1;DEPS-1::TurboID
P granule	VBH-1	not enriched
P granule	IFE-1	TurboID::GLH-1;DEPS-1::TurboID
P granule	WAGO-1	TurboID::GLH-1;DEPS-1::TurboID
Z granule	WAGO-4	TurboID::GLH-1;DEPS-1::TurboID
Z granule	ZNFX-1	TurboID::GLH-1;DEPS-1::TurboID
Mutator foci	MUT-2	not enriched
Mutator foci	MUT-7	not enriched
Mutator foci	MUT-14	not enriched
Mutator foci	MUT-15	not enriched
Mutator foci	MUT-16	not enriched
Mutator foci	NYN-1	not enriched
Mutator foci	NYN-2	not enriched
Mutator foci	RDE-2	not enriched
Mutator foci	RDE-8	not enriched
Mutator foci	RRF-1	not enriched
Mutator foci	SMUT-1	not enriched
