# Supplementary material for: Proximity labeling identifies LOTUS domain proteins that promote the formation of perinuclear germ granules in C. elegans
Source: eLife. 2021 Nov 3;10:e72276. doi: 10.7554/eLife.72276 (PMC8616582; doi:10.7554/eLife.72276)
Supplement: Supplementary file 3. [file elife-72276-supp3.xlsx]

## Sheet: Sheet1
Supplementary File 3. Nuclear pore complex proteins that are enriched by proximity labeling.
Localization	Protein	Enriched from
Cytoplasmic	NPP-9	TurboID::GLH-1;DEPS-1::TurboID
Cytoplasmic	NPP-14	TurboID::GLH-1;DEPS-1::TurboID
Cytoplasmic	NPP-17	not labeled
Cytoplasmic	NPP-24	TurboID::GLH-1
Cytoplasmic	NPP-26	not labeled
Outer/inner ring	MEL-28	not labeled
Outer/inner ring	NPP-2	not labeled
Outer/inner ring	NPP-5	not labeled
Outer/inner ring	NPP-6	TurboID::GLH-1;DEPS-1::TurboID
Outer/inner ring	NPP-10 (NUP96)	TurboID::GLH-1
Outer/inner ring	NPP-15	not labeled
Outer/inner ring	NPP-18	not labeled
Outer/inner ring	NPP-20	not labeled
Outer/inner ring	NPP-23	not labeled
Central Channel	NPP-1	not labeled
Central Channel	NPP-4	TurboID::GLH-1
Central Channel	NPP-11	not labeled
Transmembrane	NPP-12	not labeled
Transmembrane	NPP-22	not labeled
Transmembrane	NPP-25	not labeled
inner ring	NPP-10 (NUP98)	TurboID::GLH-1
inner ring	NPP-3	not labeled
inner ring	NPP-8	not labeled
inner ring	NPP-13	TurboID::GLH-1
inner ring	NPP-19	not labeled
Nuclear basket	NPP-7	TurboID::GLH-1
Nuclear basket	NPP-16	not labeled
Nuclear basket	NPP-21	TurboID::GLH-1
