# Supplementary material for: Proximity labeling identifies LOTUS domain proteins that promote the formation of perinuclear germ granules in C. elegans
Source: eLife. 2021 Nov 3;10:e72276. doi: 10.7554/eLife.72276 (PMC8616582; doi:10.7554/eLife.72276)
Supplement: Supplementary file 4. [file elife-72276-supp4.xlsx]

## Sheet: 78
Supplementary File 4. Significantly enriched Gene Ontology terms for TurboID hits.
Domain	term_name	term_id	Adjusted_p_value	intersections
Molecular Function	RNA binding	GO:0003723	2.07192e-06	WBGENE00000772,WBGENE00021929,WBGENE00008400,WBGENE00001214,WBGENE00008480,WBGENE00010405,WBGENE00009922,WBGENE00001595,WBGENE00002059,WBGENE00003229,WBGENE00003992,WBGENE00004178,WBGENE00004241,WBGENE00010280,WBGENE00015943,WBGENE00010263,WBGENE00012730,WBGENE00014208
Molecular Function	nucleic acid binding	GO:0003676	5.29683e-05	WBGENE00000473,WBGENE00000474,WBGENE00000772,WBGENE00017641,WBGENE00021929,WBGENE00008400,WBGENE00001214,WBGENE00008480,WBGENE00010405,WBGENE00009922,WBGENE00001595,WBGENE00001598,WBGENE00001599,WBGENE00001600,WBGENE00001601,WBGENE00002059,WBGENE00003229,WBGENE00003992,WBGENE00004093,WBGENE00004094,WBGENE00004178,WBGENE00004241,WBGENE00010280,WBGENE00015943,WBGENE00011061,WBGENE00010263,WBGENE000…
Molecular Function	helicase activity	GO:0004386	6.00079e-05	WBGENE00008400,WBGENE00009922,WBGENE00001598,WBGENE00001599,WBGENE00001600,WBGENE00001601,WBGENE00010280,WBGENE00014208
Molecular Function	ATPase, acting on DNA	GO:0008094	0.000202981	WBGENE00008400,WBGENE00009922,WBGENE00001598,WBGENE00001599,WBGENE00001600,WBGENE00001601,WBGENE00010280,WBGENE00014208
Molecular Function	catalytic activity, acting on DNA	GO:0140097	0.00219526	WBGENE00008400,WBGENE00009922,WBGENE00001598,WBGENE00001599,WBGENE00001600,WBGENE00001601,WBGENE00010280,WBGENE00014208
Molecular Function	ATPase	GO:0016887	0.0028344	WBGENE00000257,WBGENE00008400,WBGENE00009922,WBGENE00001598,WBGENE00001599,WBGENE00001600,WBGENE00001601,WBGENE00001819,WBGENE00010280,WBGENE00004874,WBGENE00014208
Molecular Function	binding	GO:0005488	0.0033055	WBGENE00000257,WBGENE00010631,WBGENE00000473,WBGENE00000474,WBGENE00000772,WBGENE00017641,WBGENE00017643,WBGENE00021929,WBGENE00001029,WBGENE00008400,WBGENE00021551,WBGENE00001214,WBGENE00008480,WBGENE00009052,WBGENE00010405,WBGENE00018362,WBGENE00018508,WBGENE00009922,WBGENE00001595,WBGENE00001598,WBGENE00001599,WBGENE00001600,WBGENE00001601,WBGENE00016002,WBGENE00001819,WBGENE00001829,WBGENE000…
Molecular Function	heterocyclic compound binding	GO:1901363	0.00472517	WBGENE00000257,WBGENE00000473,WBGENE00000474,WBGENE00000772,WBGENE00017641,WBGENE00021929,WBGENE00008400,WBGENE00001214,WBGENE00008480,WBGENE00010405,WBGENE00018508,WBGENE00009922,WBGENE00001595,WBGENE00001598,WBGENE00001599,WBGENE00001600,WBGENE00001601,WBGENE00001819,WBGENE00002059,WBGENE00010988,WBGENE00003229,WBGENE00003992,WBGENE00004093,WBGENE00004094,WBGENE00004178,WBGENE00004241,WBGENE000…
Molecular Function	organic cyclic compound binding	GO:0097159	0.00507142	WBGENE00000257,WBGENE00000473,WBGENE00000474,WBGENE00000772,WBGENE00017641,WBGENE00021929,WBGENE00008400,WBGENE00001214,WBGENE00008480,WBGENE00010405,WBGENE00018508,WBGENE00009922,WBGENE00001595,WBGENE00001598,WBGENE00001599,WBGENE00001600,WBGENE00001601,WBGENE00001819,WBGENE00002059,WBGENE00010988,WBGENE00003229,WBGENE00003992,WBGENE00004093,WBGENE00004094,WBGENE00004178,WBGENE00004241,WBGENE000…
Biological Process	negative regulation of gene expression	GO:0010629	2.04996e-10	WBGENE00017641,WBGENE00021929,WBGENE00008400,WBGENE00021551,WBGENE00001214,WBGENE00009052,WBGENE00001819,WBGENE00002845,WBGENE00003229,WBGENE00010280,WBGENE00015943,WBGENE00011061,WBGENE00010263,WBGENE00012730,WBGENE00014208
Biological Process	gene silencing by RNA	GO:0031047	1.45712e-07	WBGENE00017641,WBGENE00008400,WBGENE00001214,WBGENE00009052,WBGENE00001819,WBGENE00010280,WBGENE00011061,WBGENE00010263,WBGENE00014208
Biological Process	posttranscriptional regulation of gene expression	GO:0010608	4.97803e-07	WBGENE00000772,WBGENE00017641,WBGENE00021929,WBGENE00008400,WBGENE00001214,WBGENE00001595,WBGENE00001819,WBGENE00002845,WBGENE00003229,WBGENE00010280,WBGENE00015943
Biological Process	gene silencing	GO:0016458	1.09471e-06	WBGENE00017641,WBGENE00008400,WBGENE00001214,WBGENE00009052,WBGENE00001819,WBGENE00010280,WBGENE00011061,WBGENE00010263,WBGENE00014208
Biological Process	oocyte construction	GO:0007308	3.33148e-06	WBGENE00017641,WBGENE00008400,WBGENE00001214,WBGENE00009052,WBGENE00003992
Biological Process	oocyte anterior/posterior axis specification	GO:0007314	3.33148e-06	WBGENE00017641,WBGENE00008400,WBGENE00001214,WBGENE00009052,WBGENE00003992
Biological Process	maternal determination of anterior/posterior axis, embryo	GO:0008358	3.33148e-06	WBGENE00017641,WBGENE00008400,WBGENE00001214,WBGENE00009052,WBGENE00003992
Biological Process	pole plasm assembly	GO:0007315	3.33148e-06	WBGENE00017641,WBGENE00008400,WBGENE00001214,WBGENE00009052,WBGENE00003992
Biological Process	oocyte axis specification	GO:0007309	3.33148e-06	WBGENE00017641,WBGENE00008400,WBGENE00001214,WBGENE00009052,WBGENE00003992
Biological Process	P granule organization	GO:0030719	3.33148e-06	WBGENE00017641,WBGENE00008400,WBGENE00001214,WBGENE00009052,WBGENE00003992
Biological Process	anatomical structure maturation	GO:0071695	8.05529e-06	WBGENE00017641,WBGENE00008400,WBGENE00001214,WBGENE00009052,WBGENE00002059,WBGENE00003992
Biological Process	cell maturation	GO:0048469	8.05529e-06	WBGENE00017641,WBGENE00008400,WBGENE00001214,WBGENE00009052,WBGENE00002059,WBGENE00003992
Biological Process	cytoplasm organization	GO:0007028	8.34498e-06	WBGENE00017641,WBGENE00008400,WBGENE00001214,WBGENE00009052,WBGENE00003992
Biological Process	embryonic pattern specification	GO:0009880	1.01102e-05	WBGENE00017641,WBGENE00008400,WBGENE00001214,WBGENE00009052,WBGENE00003229,WBGENE00003992
Biological Process	negative regulation of macromolecule metabolic process	GO:0010605	1.05027e-05	WBGENE00017641,WBGENE00021929,WBGENE00008400,WBGENE00021551,WBGENE00001214,WBGENE00009052,WBGENE00001819,WBGENE00002845,WBGENE00003229,WBGENE00010280,WBGENE00015943,WBGENE00011061,WBGENE00010263,WBGENE00012730,WBGENE00014208
Biological Process	negative regulation of metabolic process	GO:0009892	1.43659e-05	WBGENE00017641,WBGENE00021929,WBGENE00008400,WBGENE00021551,WBGENE00001214,WBGENE00009052,WBGENE00001819,WBGENE00002845,WBGENE00003229,WBGENE00010280,WBGENE00015943,WBGENE00011061,WBGENE00010263,WBGENE00012730,WBGENE00014208
Biological Process	oogenesis	GO:0048477	1.57527e-05	WBGENE00017641,WBGENE00008400,WBGENE00001214,WBGENE00009052,WBGENE00002059,WBGENE00002845,WBGENE00003992
Biological Process	germ cell development	GO:0007281	2.68658e-05	WBGENE00017641,WBGENE00008400,WBGENE00001214,WBGENE00009052,WBGENE00002059,WBGENE00002845,WBGENE00003992,WBGENE00004178
Biological Process	negative regulation of biological process	GO:0048519	2.70853e-05	WBGENE00000257,WBGENE00017641,WBGENE00017643,WBGENE00021929,WBGENE00008400,WBGENE00021551,WBGENE00001214,WBGENE00009052,WBGENE00001819,WBGENE00002845,WBGENE00003229,WBGENE00010280,WBGENE00004813,WBGENE00015943,WBGENE00011061,WBGENE00010263,WBGENE00012730,WBGENE00014208
Biological Process	developmental maturation	GO:0021700	2.7976e-05	WBGENE00017641,WBGENE00008400,WBGENE00001214,WBGENE00009052,WBGENE00002059,WBGENE00003992
Biological Process	organelle organization	GO:0006996	3.8901e-05	WBGENE00000257,WBGENE00010631,WBGENE00017641,WBGENE00017643,WBGENE00008400,WBGENE00001214,WBGENE00009052,WBGENE00001829,WBGENE00002845,WBGENE00009113,WBGENE00003229,WBGENE00008218,WBGENE00003792,WBGENE00003795,WBGENE00003992,WBGENE00004178,WBGENE00004874,WBGENE00015943,WBGENE00010713,WBGENE00010263,WBGENE00012730,WBGENE00014208
Biological Process	oocyte differentiation	GO:0009994	4.01473e-05	WBGENE00017641,WBGENE00008400,WBGENE00001214,WBGENE00009052,WBGENE00002059,WBGENE00003992
Biological Process	oocyte development	GO:0048599	4.01473e-05	WBGENE00017641,WBGENE00008400,WBGENE00001214,WBGENE00009052,WBGENE00002059,WBGENE00003992
Biological Process	gamete generation	GO:0007276	5.58514e-05	WBGENE00017641,WBGENE00008400,WBGENE00001214,WBGENE00009052,WBGENE00002059,WBGENE00002845,WBGENE00003992,WBGENE00004178,WBGENE00010280
Biological Process	cellular component organization	GO:0016043	7.01758e-05	WBGENE00000257,WBGENE00010631,WBGENE00017641,WBGENE00017643,WBGENE00008400,WBGENE00001214,WBGENE00009052,WBGENE00010405,WBGENE00001829,WBGENE00011735,WBGENE00006405,WBGENE00002845,WBGENE00009113,WBGENE00003229,WBGENE00008218,WBGENE00003792,WBGENE00003795,WBGENE00003992,WBGENE00004178,WBGENE00004465,WBGENE00004874,WBGENE00015943,WBGENE00010713,WBGENE00010263,WBGENE00012730,WBGENE00014208
Biological Process	anterior/posterior axis specification, embryo	GO:0008595	8.2164e-05	WBGENE00017641,WBGENE00008400,WBGENE00001214,WBGENE00009052,WBGENE00003992
Biological Process	tripartite regional subdivision	GO:0007351	8.2164e-05	WBGENE00017641,WBGENE00008400,WBGENE00001214,WBGENE00009052,WBGENE00003992
Biological Process	embryonic axis specification	GO:0000578	8.2164e-05	WBGENE00017641,WBGENE00008400,WBGENE00001214,WBGENE00009052,WBGENE00003992
Biological Process	cellular process involved in reproduction in multicellular organism	GO:0022412	9.41411e-05	WBGENE00017641,WBGENE00008400,WBGENE00001214,WBGENE00009052,WBGENE00002059,WBGENE00002845,WBGENE00003992,WBGENE00004178
Biological Process	P granule assembly	GO:1903863	9.6297e-05	WBGENE00017641,WBGENE00008400,WBGENE00001214,WBGENE00009052
Biological Process	female gamete generation	GO:0007292	0.000137976	WBGENE00017641,WBGENE00008400,WBGENE00001214,WBGENE00009052,WBGENE00002059,WBGENE00002845,WBGENE00003992
Biological Process	segmentation	GO:0035282	0.000169295	WBGENE00017641,WBGENE00008400,WBGENE00001214,WBGENE00009052,WBGENE00003992
Biological Process	blastoderm segmentation	GO:0007350	0.000169295	WBGENE00017641,WBGENE00008400,WBGENE00001214,WBGENE00009052,WBGENE00003992
Biological Process	reproduction	GO:0000003	0.000379609	WBGENE00017641,WBGENE00021929,WBGENE00008400,WBGENE00001214,WBGENE00009052,WBGENE00001829,WBGENE00002059,WBGENE00002845,WBGENE00003792,WBGENE00003992,WBGENE00004178,WBGENE00010280,WBGENE00004874,WBGENE00005022,WBGENE00015943
Biological Process	cellular component organization or biogenesis	GO:0071840	0.000395528	WBGENE00000257,WBGENE00010631,WBGENE00017641,WBGENE00017643,WBGENE00008400,WBGENE00001214,WBGENE00009052,WBGENE00010405,WBGENE00001829,WBGENE00011735,WBGENE00006405,WBGENE00002845,WBGENE00009113,WBGENE00003229,WBGENE00008218,WBGENE00003792,WBGENE00003795,WBGENE00003992,WBGENE00004178,WBGENE00004465,WBGENE00004874,WBGENE00015943,WBGENE00010713,WBGENE00010263,WBGENE00012730,WBGENE00014208
Biological Process	anterior/posterior axis specification	GO:0009948	0.000462378	WBGENE00017641,WBGENE00008400,WBGENE00001214,WBGENE00009052,WBGENE00003992
Biological Process	sexual reproduction	GO:0019953	0.000521071	WBGENE00017641,WBGENE00008400,WBGENE00001214,WBGENE00009052,WBGENE00002059,WBGENE00002845,WBGENE00003992,WBGENE00004178,WBGENE00010280
Biological Process	developmental process	GO:0032502	0.000639192	WBGENE00010631,WBGENE00017641,WBGENE00021929,WBGENE00008400,WBGENE00001214,WBGENE00009052,WBGENE00001819,WBGENE00002059,WBGENE00002845,WBGENE00009113,WBGENE00003229,WBGENE00020719,WBGENE00003792,WBGENE00003795,WBGENE00003992,WBGENE00004178,WBGENE00010280,WBGENE00004874,WBGENE00005022,WBGENE00015943,WBGENE00011061,WBGENE00012730
Biological Process	multi-organism reproductive process	GO:0044703	0.00083288	WBGENE00017641,WBGENE00008400,WBGENE00001214,WBGENE00009052,WBGENE00002059,WBGENE00002845,WBGENE00003992,WBGENE00004178,WBGENE00010280
Biological Process	multi-organism process	GO:0051704	0.00083288	WBGENE00017641,WBGENE00008400,WBGENE00001214,WBGENE00009052,WBGENE00002059,WBGENE00002845,WBGENE00003992,WBGENE00004178,WBGENE00010280
Biological Process	multicellular organismal reproductive process	GO:0048609	0.000835615	WBGENE00017641,WBGENE00008400,WBGENE00001214,WBGENE00009052,WBGENE00002059,WBGENE00002845,WBGENE00003992,WBGENE00004178,WBGENE00010280,WBGENE00005022
Biological Process	axis specification	GO:0009798	0.00122997	WBGENE00017641,WBGENE00008400,WBGENE00001214,WBGENE00009052,WBGENE00003992
Biological Process	multicellular organism reproduction	GO:0032504	0.00161389	WBGENE00017641,WBGENE00008400,WBGENE00001214,WBGENE00009052,WBGENE00002059,WBGENE00002845,WBGENE00003992,WBGENE00004178,WBGENE00010280,WBGENE00005022
Biological Process	pattern specification process	GO:0007389	0.00178449	WBGENE00017641,WBGENE00008400,WBGENE00001214,WBGENE00009052,WBGENE00003229,WBGENE00003992
Biological Process	anatomical structure development	GO:0048856	0.00215577	WBGENE00010631,WBGENE00017641,WBGENE00021929,WBGENE00008400,WBGENE00001214,WBGENE00009052,WBGENE00002059,WBGENE00002845,WBGENE00009113,WBGENE00003229,WBGENE00020719,WBGENE00003792,WBGENE00003795,WBGENE00003992,WBGENE00004178,WBGENE00004874,WBGENE00005022,WBGENE00015943,WBGENE00011061,WBGENE00012730
Biological Process	anterior/posterior pattern specification	GO:0009952	0.00243708	WBGENE00017641,WBGENE00008400,WBGENE00001214,WBGENE00009052,WBGENE00003992
Biological Process	mitotic nuclear division	GO:0140014	0.0029614	WBGENE00000257,WBGENE00017641,WBGENE00017643,WBGENE00001829,WBGENE00004178,WBGENE00004874
Biological Process	RNA interference	GO:0016246	0.00312214	WBGENE00017641,WBGENE00008400,WBGENE00001214,WBGENE00001819,WBGENE00010280
Biological Process	reproductive process	GO:0022414	0.00456286	WBGENE00017641,WBGENE00008400,WBGENE00001214,WBGENE00009052,WBGENE00001829,WBGENE00002059,WBGENE00002845,WBGENE00003792,WBGENE00003992,WBGENE00004178,WBGENE00010280,WBGENE00004874,WBGENE00005022
Biological Process	developmental process involved in reproduction	GO:0003006	0.00489414	WBGENE00017641,WBGENE00008400,WBGENE00001214,WBGENE00009052,WBGENE00002059,WBGENE00002845,WBGENE00003792,WBGENE00003992,WBGENE00004178,WBGENE00004874
Biological Process	DNA packaging	GO:0006323	0.00550348	WBGENE00001214,WBGENE00008218,WBGENE00004874,WBGENE00010263,WBGENE00014208
Biological Process	cellular component assembly	GO:0022607	0.0055356	WBGENE00000257,WBGENE00017641,WBGENE00008400,WBGENE00001214,WBGENE00009052,WBGENE00001829,WBGENE00011735,WBGENE00008218,WBGENE00003992,WBGENE00004465,WBGENE00015943,WBGENE00010263,WBGENE00012730,WBGENE00014208
Biological Process	regulation of cellular amide metabolic process	GO:0034248	0.00627207	WBGENE00000772,WBGENE00021929,WBGENE00001595,WBGENE00002845,WBGENE00003229,WBGENE00010280
Biological Process	regulation of translation	GO:0006417	0.00627207	WBGENE00000772,WBGENE00021929,WBGENE00001595,WBGENE00002845,WBGENE00003229,WBGENE00010280
Biological Process	regulation of gene expression	GO:0010468	0.00669627	WBGENE00000473,WBGENE00000474,WBGENE00000772,WBGENE00017641,WBGENE00021929,WBGENE00008400,WBGENE00021551,WBGENE00001214,WBGENE00009052,WBGENE00001595,WBGENE00001819,WBGENE00002845,WBGENE00007012,WBGENE00003229,WBGENE00010280,WBGENE00015943,WBGENE00011061,WBGENE00010263,WBGENE00012730,WBGENE00014208
Biological Process	multicellular organism development	GO:0007275	0.00703563	WBGENE00010631,WBGENE00017641,WBGENE00021929,WBGENE00008400,WBGENE00001214,WBGENE00009052,WBGENE00002845,WBGENE00009113,WBGENE00003229,WBGENE00020719,WBGENE00003792,WBGENE00003795,WBGENE00003992,WBGENE00004874,WBGENE00005022,WBGENE00015943,WBGENE00011061,WBGENE00012730
Biological Process	heterochromatin assembly by small RNA	GO:0031048	0.00755929	WBGENE00001214,WBGENE00010263,WBGENE00014208
Biological Process	regionalization	GO:0003002	0.00827627	WBGENE00017641,WBGENE00008400,WBGENE00001214,WBGENE00009052,WBGENE00003992
Biological Process	dsRNA processing	GO:0031050	0.0105933	WBGENE00008400,WBGENE00001214,WBGENE00009052,WBGENE00010280
Biological Process	production of small RNA involved in gene silencing by RNA	GO:0070918	0.0105933	WBGENE00008400,WBGENE00001214,WBGENE00009052,WBGENE00010280
Biological Process	post-transcriptional gene silencing by RNA	GO:0035194	0.013156	WBGENE00017641,WBGENE00008400,WBGENE00001214,WBGENE00001819,WBGENE00010280
Biological Process	posttranscriptional gene silencing	GO:0016441	0.013156	WBGENE00017641,WBGENE00008400,WBGENE00001214,WBGENE00001819,WBGENE00010280
Biological Process	organelle assembly	GO:0070925	0.0168096	WBGENE00000257,WBGENE00017641,WBGENE00008400,WBGENE00001214,WBGENE00009052,WBGENE00001829,WBGENE00015943,WBGENE00012730
Biological Process	mitotic sister chromatid segregation	GO:0000070	0.0170095	WBGENE00000257,WBGENE00017641,WBGENE00017643,WBGENE00001829,WBGENE00004874
Biological Process	heterochromatin assembly	GO:0031507	0.0219904	WBGENE00001214,WBGENE00010263,WBGENE00014208
Biological Process	chromatin assembly	GO:0031497	0.02481	WBGENE00001214,WBGENE00008218,WBGENE00010263,WBGENE00014208
Biological Process	mitotic cell cycle process	GO:1903047	0.0258213	WBGENE00000257,WBGENE00017641,WBGENE00017643,WBGENE00001829,WBGENE00002845,WBGENE00004178,WBGENE00004874
Biological Process	heterochromatin organization	GO:0070828	0.0291962	WBGENE00001214,WBGENE00010263,WBGENE00014208
Biological Process	nuclear-transcribed mRNA catabolic process	GO:0000956	0.0294142	WBGENE00021929,WBGENE00021551,WBGENE00002845,WBGENE00015943,WBGENE00012730
Biological Process	cell development	GO:0048468	0.0331497	WBGENE00017641,WBGENE00008400,WBGENE00001214,WBGENE00009052,WBGENE00002059,WBGENE00002845,WBGENE00009113,WBGENE00003992,WBGENE00004178
Biological Process	regulation of macromolecule metabolic process	GO:0060255	0.0387357	WBGENE00000473,WBGENE00000474,WBGENE00000772,WBGENE00017641,WBGENE00021929,WBGENE00008400,WBGENE00021551,WBGENE00001214,WBGENE00009052,WBGENE00001595,WBGENE00001819,WBGENE00002845,WBGENE00007012,WBGENE00003229,WBGENE00010280,WBGENE00004459,WBGENE00015943,WBGENE00011061,WBGENE00010263,WBGENE00012730,WBGENE00014208
Biological Process	chromatin assembly or disassembly	GO:0006333	0.0399247	WBGENE00001214,WBGENE00008218,WBGENE00010263,WBGENE00014208
Biological Process	sister chromatid segregation	GO:0000819	0.0418914	WBGENE00000257,WBGENE00017641,WBGENE00017643,WBGENE00001829,WBGENE00004874
Biological Process	chromatin remodeling	GO:0006338	0.0445657	WBGENE00001214,WBGENE00008218,WBGENE00010263,WBGENE00014208
Biological Process	embryo development	GO:0009790	0.0454242	WBGENE00017641,WBGENE00008400,WBGENE00001214,WBGENE00009052,WBGENE00003229,WBGENE00003792,WBGENE00003795,WBGENE00003992,WBGENE00005022
Cellular Compartment	cytoplasmic ribonucleoprotein granule	GO:0036464	3.01693e-18	WBGENE00017641,WBGENE00021929,WBGENE00008400,WBGENE00021551,WBGENE00001214,WBGENE00014113,WBGENE00002059,WBGENE00002845,WBGENE00003229,WBGENE00003992,WBGENE00004178,WBGENE00010280,WBGENE00015943,WBGENE00011061
Cellular Compartment	ribonucleoprotein granule	GO:0035770	3.7222e-18	WBGENE00017641,WBGENE00021929,WBGENE00008400,WBGENE00021551,WBGENE00001214,WBGENE00014113,WBGENE00002059,WBGENE00002845,WBGENE00003229,WBGENE00003992,WBGENE00004178,WBGENE00010280,WBGENE00015943,WBGENE00011061
Cellular Compartment	P granule	GO:0043186	5.51944e-16	WBGENE00017641,WBGENE00021929,WBGENE00008400,WBGENE00001214,WBGENE00002059,WBGENE00003229,WBGENE00003992,WBGENE00004178,WBGENE00010280,WBGENE00015943,WBGENE00011061
Cellular Compartment	germ plasm	GO:0060293	5.51944e-16	WBGENE00017641,WBGENE00021929,WBGENE00008400,WBGENE00001214,WBGENE00002059,WBGENE00003229,WBGENE00003992,WBGENE00004178,WBGENE00010280,WBGENE00015943,WBGENE00011061
Cellular Compartment	pole plasm	GO:0045495	5.51944e-16	WBGENE00017641,WBGENE00021929,WBGENE00008400,WBGENE00001214,WBGENE00002059,WBGENE00003229,WBGENE00003992,WBGENE00004178,WBGENE00010280,WBGENE00015943,WBGENE00011061
Cellular Compartment	supramolecular complex	GO:0099080	1.23653e-15	WBGENE00000257,WBGENE00017641,WBGENE00017643,WBGENE00021929,WBGENE00008400,WBGENE00021551,WBGENE00001214,WBGENE00001829,WBGENE00011735,WBGENE00014113,WBGENE00002059,WBGENE00002845,WBGENE00009113,WBGENE00003229,WBGENE00003992,WBGENE00004178,WBGENE00010280,WBGENE00015943,WBGENE00011061
Cellular Compartment	intracellular anatomical structure	GO:0005622	5.68812e-08	WBGENE00000257,WBGENE00000473,WBGENE00000474,WBGENE00017641,WBGENE00017643,WBGENE00021929,WBGENE00001029,WBGENE00008400,WBGENE00021551,WBGENE00001214,WBGENE00009052,WBGENE00010405,WBGENE00018508,WBGENE00001819,WBGENE00001829,WBGENE00011735,WBGENE00014113,WBGENE00002059,WBGENE00002073,WBGENE00006405,WBGENE00002845,WBGENE00009113,WBGENE00007012,WBGENE00003229,WBGENE00008218,WBGENE00020719,WBGENE000…
Cellular Compartment	metaphase plate	GO:0070090	2.00119e-07	WBGENE00017641,WBGENE00008400,WBGENE00001214,WBGENE00009052
Cellular Compartment	cytoplasm	GO:0005737	2.39724e-07	WBGENE00017641,WBGENE00017643,WBGENE00021929,WBGENE00001029,WBGENE00008400,WBGENE00021551,WBGENE00001214,WBGENE00009052,WBGENE00010405,WBGENE00018508,WBGENE00001819,WBGENE00011735,WBGENE00014113,WBGENE00002059,WBGENE00002073,WBGENE00006405,WBGENE00002845,WBGENE00009113,WBGENE00003229,WBGENE00020719,WBGENE00003795,WBGENE00003992,WBGENE00004143,WBGENE00004178,WBGENE00010280,WBGENE00004465,WBGENE000…
Cellular Compartment	intracellular non-membrane-bounded organelle	GO:0043232	3.56391e-07	WBGENE00000257,WBGENE00017641,WBGENE00017643,WBGENE00021929,WBGENE00008400,WBGENE00021551,WBGENE00001214,WBGENE00009052,WBGENE00001829,WBGENE00011735,WBGENE00014113,WBGENE00002059,WBGENE00002845,WBGENE00009113,WBGENE00003229,WBGENE00003992,WBGENE00004178,WBGENE00010280,WBGENE00004874,WBGENE00015943,WBGENE00011061
Cellular Compartment	non-membrane-bounded organelle	GO:0043228	3.56391e-07	WBGENE00000257,WBGENE00017641,WBGENE00017643,WBGENE00021929,WBGENE00008400,WBGENE00021551,WBGENE00001214,WBGENE00009052,WBGENE00001829,WBGENE00011735,WBGENE00014113,WBGENE00002059,WBGENE00002845,WBGENE00009113,WBGENE00003229,WBGENE00003992,WBGENE00004178,WBGENE00010280,WBGENE00004874,WBGENE00015943,WBGENE00011061
Cellular Compartment	condensed chromosome	GO:0000793	2.21025e-05	WBGENE00017641,WBGENE00017643,WBGENE00008400,WBGENE00001214,WBGENE00009052,WBGENE00001829,WBGENE00004874
Cellular Compartment	intracellular organelle	GO:0043229	9.69046e-05	WBGENE00000257,WBGENE00000473,WBGENE00000474,WBGENE00017641,WBGENE00017643,WBGENE00021929,WBGENE00008400,WBGENE00021551,WBGENE00001214,WBGENE00009052,WBGENE00001819,WBGENE00001829,WBGENE00011735,WBGENE00014113,WBGENE00002059,WBGENE00006405,WBGENE00002845,WBGENE00009113,WBGENE00007012,WBGENE00003229,WBGENE00008218,WBGENE00003792,WBGENE00003795,WBGENE00003992,WBGENE00004143,WBGENE00004178,WBGENE000…
Cellular Compartment	organelle	GO:0043226	0.000156429	WBGENE00000257,WBGENE00000473,WBGENE00000474,WBGENE00017641,WBGENE00017643,WBGENE00021929,WBGENE00008400,WBGENE00021551,WBGENE00001214,WBGENE00009052,WBGENE00001819,WBGENE00001829,WBGENE00011735,WBGENE00014113,WBGENE00002059,WBGENE00006405,WBGENE00002845,WBGENE00009113,WBGENE00007012,WBGENE00003229,WBGENE00008218,WBGENE00003792,WBGENE00003795,WBGENE00003992,WBGENE00004143,WBGENE00004178,WBGENE000…
Cellular Compartment	P-body	GO:0000932	0.00033481	WBGENE00021929,WBGENE00021551,WBGENE00002845,WBGENE00010280
Cellular Compartment	nucleus	GO:0005634	0.000868445	WBGENE00000257,WBGENE00000473,WBGENE00000474,WBGENE00017641,WBGENE00017643,WBGENE00008400,WBGENE00001214,WBGENE00009052,WBGENE00001829,WBGENE00002845,WBGENE00007012,WBGENE00008218,WBGENE00003792,WBGENE00003795,WBGENE00004143,WBGENE00010280,WBGENE00004465,WBGENE00004813,WBGENE00004874,WBGENE00005022,WBGENE00015943,WBGENE00012730,WBGENE00014208
Cellular Compartment	condensed nuclear chromosome	GO:0000794	0.00213763	WBGENE00017641,WBGENE00008400,WBGENE00001214,WBGENE00009052
Cellular Compartment	nuclear RNA-directed RNA polymerase complex	GO:0031380	0.0238786	WBGENE00001214,WBGENE00014208
Cellular Compartment	RNA-directed RNA polymerase complex	GO:0031379	0.0238786	WBGENE00001214,WBGENE00014208
Cellular Compartment	perinuclear region of cytoplasm	GO:0048471	0.0351492	WBGENE00014113,WBGENE00010280,WBGENE00010263,WBGENE00014208
Cellular Compartment	nuclear chromosome	GO:0000228	0.0370409	WBGENE00017641,WBGENE00008400,WBGENE00001214,WBGENE00009052
