# Supplementary figures and images for: Proximity labeling identifies LOTUS domain proteins that promote the formation of perinuclear germ granules in C. elegans
Source: eLife journal article supplement (doi:10.7554/elife.72276), 2021-11-03

Figure 1 source data

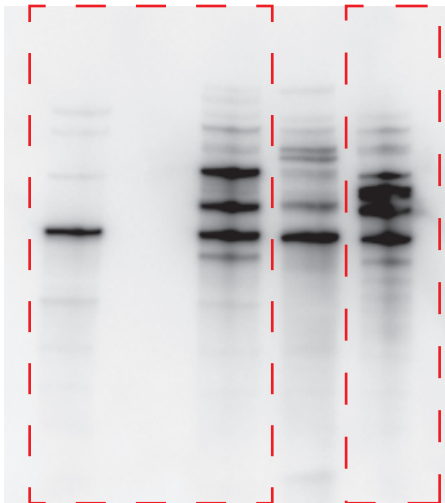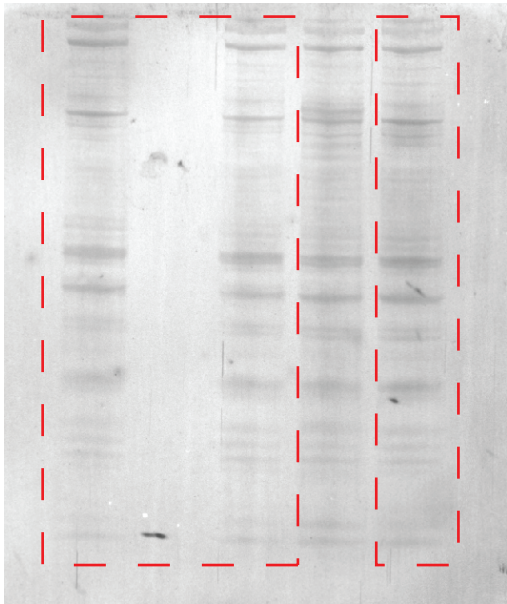

Supplement: fig1-data2 [file elife-72276-fig1-data2-v2.zip]

Figure 1—figure supplement 1 Source data

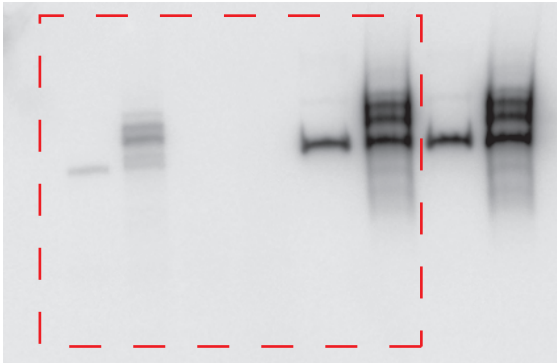

Supplement: fig1-figsupp1-data1 [file elife-72276-fig1-figsupp1-data1-v2.zip]
